# Supplementary material for: Relationship between physiological and parent-observed auditory over-responsiveness in children with typical development and those with autism spectrum disorders
Source: PubMed Central journal article supplement — Autism. 2016 Dec 19;22(3):291–8. doi: 10.1177/1362361316680497 (PMC5946668; doi:10.1177/1362361316680497), 2016-12-19

**Supplementary figure 1.** Summary of the acoustic stimulus paradigm

**Supplementary Figure 1 top**

**Background noise:** 60 dB, white noise (Acclimation: 5 min)

**Startle stimuli:**

**Block 1 :** Pulse (65, 75, 85, 95, 105 dB, white noise) alone, 6 trials for each condition.

**Block 2 :** 105 dB Pulse with prepulse (65, 70, 75 dB, white noise) or pulse alone, 8 trials for each condition

**Block 3 :** 105 dB Pulse alone for 6 trials (to examine habituation).  
(total 68 trials, pseudorandom order)

**Inter-trial intervals:** 10-20 sec (average 15 sec; total 20 min)

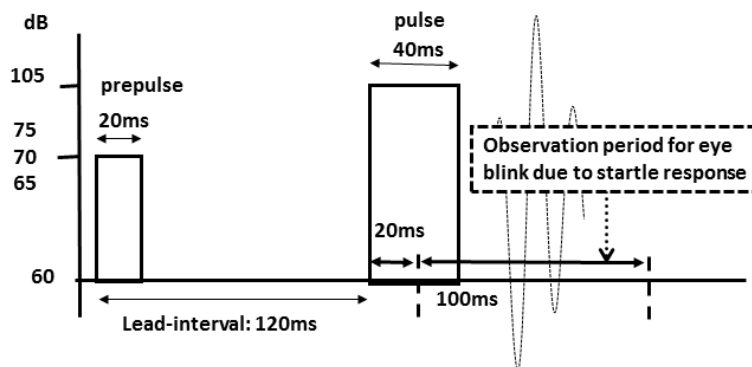

Supplement: AUT680497_Supplementary-material.pdf [file AUT680497_Supplementary-material.pdf]
